# Supplementary material
Source: PubMed Central journal article supplement (PMC2984159)
Supplement: 1007836107_pnas.201007836SI.pdf [file 1007836107_pnas.201007836SI.pdf]

# Supporting Information

Kodama et al. 10.1073/pnas.1007836107

## SI Materials and Methods

**Plant Growth Conditions and Mutant Screen.** *Arabidopsis thaliana* seeds (Columbia) were sown on one-third-strength Murashige and Skoog culture medium containing 1% (wt/vol) sucrose with 0.8% (wt/vol) agar and incubated for 2 d at 4 °C. After incubation, they were grown under white light at  $\approx 100 \mu\text{mol m}^{-2} \text{s}^{-1}$  under a light (16 h)/dark (8 h) cycle at 23 °C in a growth chamber. Plants were grown for 2 wk for the screen and mapping of mutant plants and for 3 wk for analysis of chloroplast movements and cytoplasmic streaming. For protoplast isolation, plants were grown in soil for 3 wk.  $\gamma$ -ray and fast neutron-mutagenized seeds (Lehle Seeds) were used to screen mutants. The techniques for the mutant screen using the white band assay (WBA) and genetic mapping were previously reported (1–3). The transferred DNA (T-DNA) tagged lines, SALK and GABI-Kat (4), were provided by the Arabidopsis Biological Resource Center and the European Arabidopsis Stock Center, respectively.

**cDNA Cloning and RT-PCR.** Full-length cDNAs were isolated by the 5' and 3' rapid amplification of cDNA ends method using the 5'- and 3'-RACE System kits, according to the manufacturer's instructions (Invitrogen). Total RNA was extracted from leaves, stems, and roots of 7-wk-old plants for RT-PCR. The first-strand cDNAs were synthesized from total RNA using oligo-dT primers. The amounts of cDNA were normalized using the  $\beta$ -tubulin 2 (*TUB*) and ubiquitin-conjugating enzyme (*UBC*) genes as internal controls. The DNA fragments for *WEB1*, *PMI2*, *TUB*, and *UBC* were amplified by PCR with the following primers: *WEB1* [5'-AAGT-CAATCCTGAGTTGATTGATTCCACCA-3' and 5'-TTCCA-GTGCTCACCGGTGATCCTGA-3'], *PMI2* [5'-GGAATTTAG-ATGGAAGTGTATCAG-3' and 5'-CCTTAGCAGACTCAGC-AACTC-3'], *TUB* [5'-CTCTGACCTCCGAAAGCTTGC-3' and 5'-TCACCTTCTTCATCCGCAGTT-3'], and *UBC* [5'-TCAAATGGACCGCTCTTATCAAAGG-3' and 5'-TCCAACCAGGACTCCAAGCATTC-3'].

**Analyses of Chloroplast Movement.** Detached rosette leaves from seedlings were used for the WBA. The leaves were placed on a 0.8% agar plate with their adaxial sides up and enclosed with transparent film. The film-enclosed leaves were covered with a non-light-transmitting black plate with 1-mm-wide open slits and irradiated with continuous white light (500 and 1,200  $\mu\text{mol m}^{-2} \text{s}^{-1}$ ) in a growth chamber with a 3.6-kW xenon lamp (Ushio) at 22 °C and 50% humidity. The individual detached leaves were observed after the appropriate irradiation time. We developed an evaluation method for the WBA. Because plant absorbs blue and red, not green, lights for photosynthesis and photoresponses, the blue and red lights are hard to be transmitted through leaf. We took advantage of the phenomenon for developing the evaluation method. To remove the information of green channel image, we first split the RGB image into three independent channel images. Under our experimental condition, red light was likely more transmitted through the leaf, compared with blue light. This effect might depend on spectral characteristics of the light source. Nevertheless, because the white band in the blue channel image was visibly clearer than that in the red channel image, we decided to use only the blue channel image to develop a simple evaluation method for WBA. Blue channel images were isolated from the RGB photographs using Java-based ImageJ software (<http://rsb.info.nih.gov/ij/>). The midpoints (pixel 20) of the long sides of the region of interest (ROI; 10  $\times$  40 pixels) were assigned to the midpoint of the width of the irradiated area, such

that the lines of the long sides were perpendicular to the irradiated area (Fig. 3B in main text). A pixel profile of the ROI was then obtained using the ImageJ command function. The chloroplast velocity was determined by blue light microbeam irradiation with a custom-made system that has been described previously (5). After recording the movement time (*t*) and distance (*d*) that a chloroplast moved, the velocity (*v*) of chloroplast movement was calculated with the equation  $v = d/t$ . For analysis of leaf transmittance changes, detached leaves (from 16- to 19-d-old seedlings) were placed on 1% gellan gum medium in a 96-well plate, and the red light (650 nm) transmittance was automatically recorded every 2 min using a microplate reader (VersaMax; Molecular Devices). Blue light was provided from a blue light-emitting diode illuminator (LED-mB; EYELA).

**Protein Analyses.** The N-terminal region (1–134 aa) of *WEB1* was subcloned into the pGEX-2T vector, which contains the *GST* gene (Amersham Pharmacia). The *GST* fusion protein was expressed in the *Escherichia coli* BL21 strain with 1 mM isopropyl- $\beta$ -D-thiogalactoside (IPTG) and purified using glutathione-Sepharose 4B beads (Amersham Pharmacia). The *WEB1* fragment was eluted by cleavage of the *GST*-*WEB1* fusion protein with the Thrombin protease (Amersham Pharmacia). Polyclonal antisera against the fusion protein raised in rabbit were used as an anti-*WEB1* antibody for immunoblot analysis. Protein extracts were prepared from the rosette leaves of 4-wk-old plants grown in soil. The leaves were ground in extraction buffer containing 50 mM Tris-HCl (pH 7.5), 150 mM NaCl, 2 mM EDTA, 1 mM MgCl<sub>2</sub>, 10% glycerol, and 1 tablet (per 25 mL) of complete proteinase inhibitor mixture (Roche) and homogenized with a glass homogenizer. After centrifugation at 11,000  $\times g$  for 15 min at 4 °C twice to remove insoluble debris, crude extracts were further fractionated by ultracentrifugation at 100,000  $\times g$  for 1 h at 4 °C. The resulting supernatant and pellet were used as the soluble (S) and microsomal (P) protein fractions, respectively. For immunoblot analysis, 50  $\mu\text{g}$  of protein sample was separated on 7.5% SDS/PAGE gels. The separated proteins were electronically transferred onto nitrocellulose membrane, and *WEB1*, *phot1*, and *phot2* were detected with anti-*WEB1*, anti-*phot1* (6), and anti-*phot2* (7) polyclonal antibodies, respectively. Alkaline phosphatase-conjugated goat anti-rabbit IgG (Promega) was used as a secondary antibody. For size exclusion chromatography, the soluble fractions were prepared from 4-wk-old rosette leaves, as described above. Approximately 2 mg of the protein sample in a 0.5-mL injection volume was separated in a Superdex 200 10/300 column connected to an ÄKTAexplorer 10S (GE Healthcare). The fractionated protein extracts were collected in 0.5-mL fractions and precipitated with 0.5 mL of cold trichloroacetic acid (TCA)–acetone solution (10% TCA in cold acetone). The protein pellets were rinsed twice with cold acetone and dissolved and denatured in 50  $\mu\text{L}$  of 1 $\times$  SDS/PAGE sample buffer, and half of the protein sample was subsequently used for immunoblot analysis. In vitro transcription, translation, and expression were carried out as previously described (8) and according to the manufacturer's instructions (Promega). The cDNA for *WEB1* was subcloned into the pET22(b)+ vector, and the *WEB1*-6xHis protein was expressed in the *E. coli* BL21 (DE3) strain. The cells were boiled and centrifuged at 11,000  $\times g$  for 10 min to remove the insoluble fraction. The *WEB1*-6xHis fusion protein was detected with a mouse anti-His antibody and alkaline phosphatase-conjugated anti-mouse antibody (Promega).







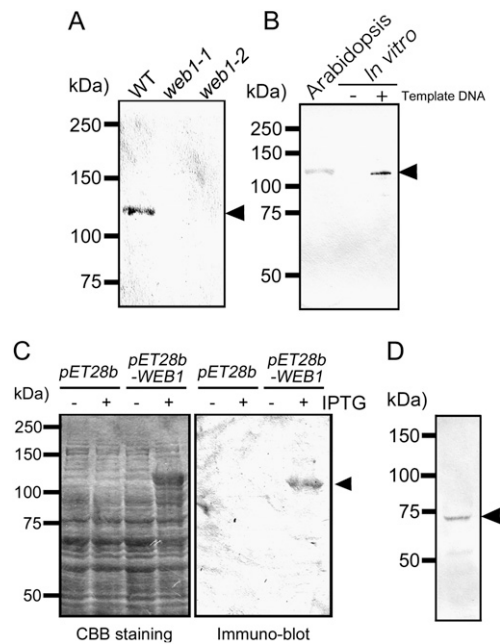

**Fig. 53.** Molecular masses of the WEB1 and PMI2 proteins. (A) Molecular mass of the WEB1 protein in *Arabidopsis*. Crude extracts from *Arabidopsis* rosette leaves (WT, *web1-1*, and *web1-2*) were directly used for immunoblot analysis. After fractionation by SDS/PAGE, proteins were electrically transferred to a nitrocellulose membrane, and WEB1 was detected with an anti-WEB1 polyclonal antibody and an alkaline phosphatase-conjugated anti-rabbit secondary antibody (Promega). Arrowhead indicates the position of the WEB1 protein. (B) Expression of the WEB1 protein in the in vitro transcription/translation expression system. The in vitro transcription/translation expression system was used according to the manufacturer's instructions (Promega). (C) Expression of WEB1-6xHis protein in *E. coli*. WEB1-6xHis was induced with 1 mM IPTG and detected with a mouse anti-His antibody and an alkaline phosphatase-conjugated anti-mouse secondary antibody (Promega). (D) Expression of PMI2-6xHis protein in the in vitro transcription/translation expression system.

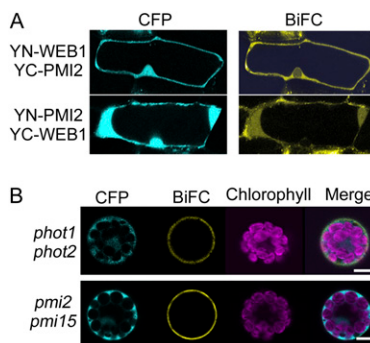

**Fig. 54.** Bimolecular fluorescence complementation (BiFC) assay. (A) Visualization of the WEB1-PMI2 interaction in onion epidermal cells. Onion epidermal cell layers were bombarded with gold particles coated with the appropriate BiFC constructs. The cells were observed under a confocal microscope (SP2; Leica). CFP was used as a cytosolic and nuclear localization control. (B) Visualization of WEB1 homodimerization in *phot1phot2* and *pmi2-3pmi15-1*. *Arabidopsis* protoplast cells were isolated from *phot1phot2* and *pmi2-3pmi15-1* plants, and YN-WEB1 and YC-WEB1 were coexpressed in the protoplasts. After a 24-h incubation at 25 °C in the dark, the cells were observed under a confocal microscope (SP5; Leica). (Scale bars, 10  $\mu$ m.)

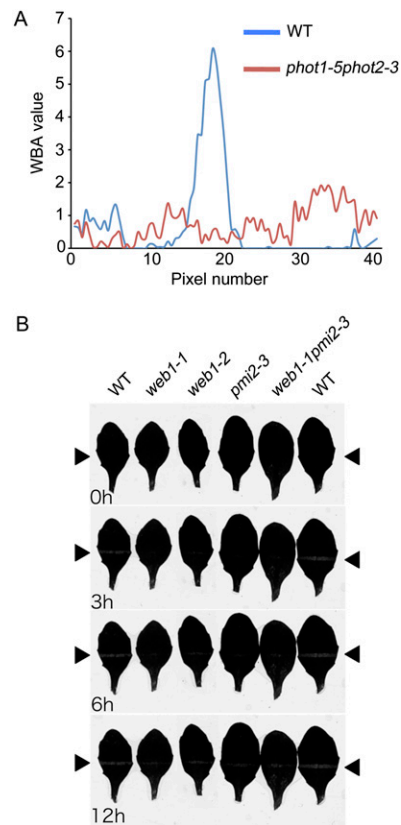

**Fig. S5.** Evaluation method for WBA and time course experiment. (A) Preliminary test. Detached rosette leaves of WT and *phot1-5phot2-3* mutant were aligned on a 0.8% agar plate, covered with a non-light-transmitting black plate with a 1-mm-wide open slit, and irradiated with continuous strong white light ( $\approx 800 \mu\text{mol m}^{-2} \text{s}^{-1}$ ) for 30 min. Vertical and horizontal axes show the WBA values and pixel numbers of the long side of the ROI, respectively. (B) Time course experiment. Detached rosette leaves of WT and mutants were irradiated with a continuous strong white light ( $500 \mu\text{mol m}^{-2} \text{s}^{-1}$ ) for 0, 3, 6, and 12 h in a growth chamber. Arrowheads indicate the irradiated position.

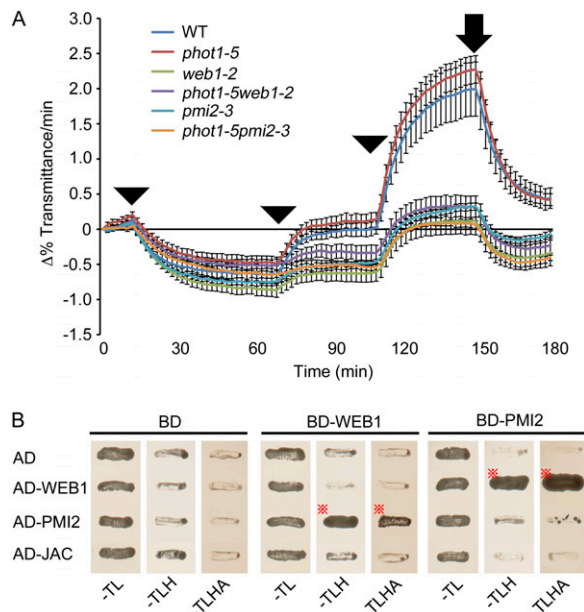

**Fig. 56.** No apparent genetic interaction with *PHOT1* and no physical interaction with *JAC1* in Y2H assay. (A) No apparent genetic interactions of *WEB1* and *PMI2* with *PHOT1*. The changes in leaf transmittance caused by chloroplast photorelocation movement were measured in the WT plants and *phot1-5*, *web1-2*, *phot1-5web1-2*, *pmi2-3*, and *phot1-5pmi2-3* mutants. The graph shows data from a representative experiment using eight leaves of each indicated genotype. After 10 min in darkness, leaves were irradiated with blue light at 3, 20, and 50  $\mu\text{mol m}^{-2} \text{s}^{-1}$  sequentially at 10, 70, and 110 min, respectively, as indicated by the arrowheads. The blue light was turned off at 150 min (arrow). (B) No detection of possible physical interactions of *WEB1* and *PMI2* with *JAC1* in Y2H assay. The Gal4 DNA binding domain (BD) and activation domain (AD) fusion proteins were coexpressed in diploid yeast cells that were constructed via mating. The resulting transformants were used in experiments for complementation of growth on SD agar supplemented with a mixture of the appropriate amino acids without Trp (T), Leu (L), His (H), and Ade (A). Interaction between *WEB1* and *PMI2* was used as a positive control interaction. Asterisks indicate positive interaction clones.

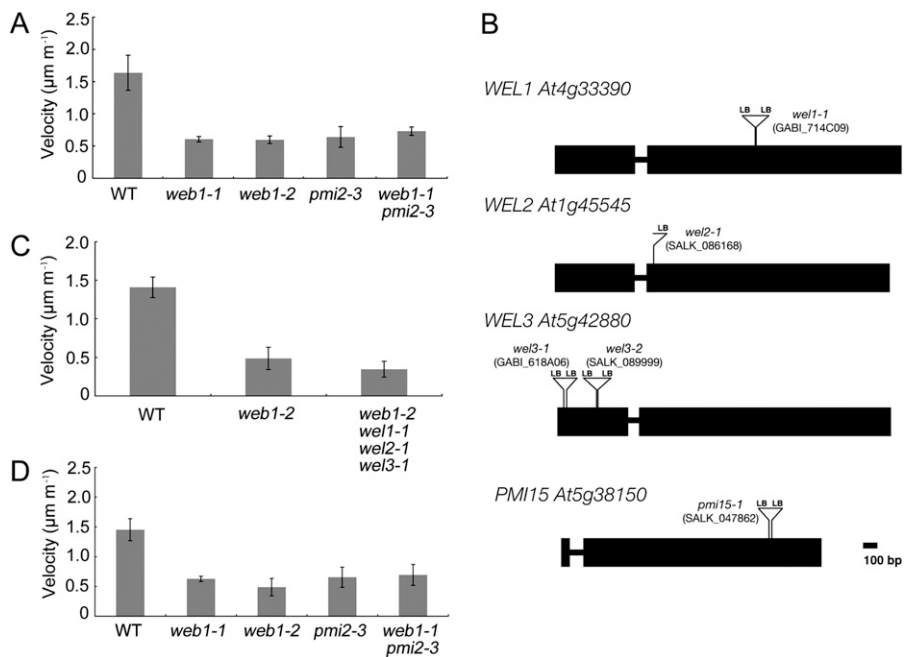

**Fig. 57.** Direct measurement of chloroplast velocity and *WEB1*- and *PMI2*-like genes. (A) Chloroplast velocity in the avoidance response. The blue light microbeam irradiation method was used to calculate chloroplast velocity. To induce the avoidance response, 30  $\mu\text{mol m}^{-2} \text{s}^{-1}$  of blue light was irradiated on the mesophyll cells. After recording the time (t) and distance (d) of chloroplast movement, the velocity (v) of chloroplast movement was calculated with the equation  $v = d/t$ . (B) Schematic illustrations show the gene structures of *WEL1*, *WEL2*, *WEL3*, and *PMI15*. Rectangles and intervening bars indicate exons and introns, respectively. T-DNA insertion sites are also indicated. LB, left border of the T-DNA. The SALK and GABI-Kat mutant lines were obtained from the Arabidopsis Biological Resource Center and the European Arabidopsis Stock Center, respectively. (C) Velocity of chloroplasts in the avoidance response in a quadruple mutant plant. Strong blue light (30  $\mu\text{mol m}^{-2} \text{s}^{-1}$ ) was irradiated on the mesophyll cells of WT, *web1*, and *web1web1web2web3* quadruple-mutant plants to induce the avoidance response. (D) Chloroplast velocity in the accumulation response. The blue light microbeam irradiation method was used to calculate chloroplast velocity. To induce the accumulation response, 10  $\mu\text{mol m}^{-2} \text{s}^{-1}$  of blue light was shone on the mesophyll cells.





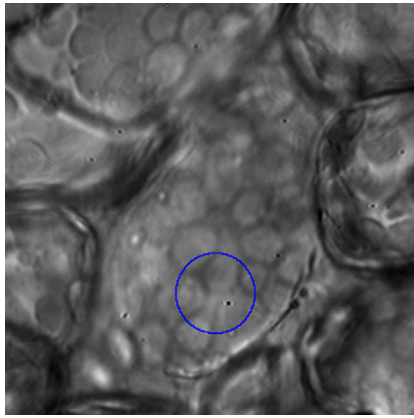

**Movie S3.** Chloroplast avoidance movement in *web1-2*. A mesophyll cell was irradiated with strong blue light ( $30 \mu\text{mol m}^{-2} \text{s}^{-1}$ ). Images were acquired at 1-min intervals for 30 min. Circle indicates the irradiated area.

[Movie S3](#)

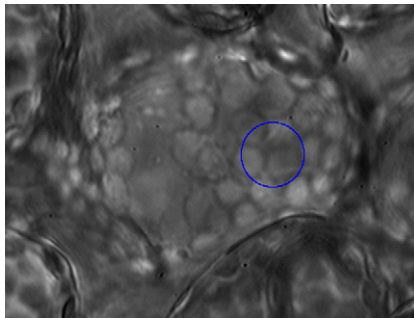

**Movie S4.** Chloroplast avoidance movement in *web2-1/pmi2-3*. A mesophyll cell was irradiated with strong blue light ( $30 \mu\text{mol m}^{-2} \text{s}^{-1}$ ). Images were acquired at 1-min intervals for 30 min. Circle indicates the irradiated area.

[Movie S4](#)

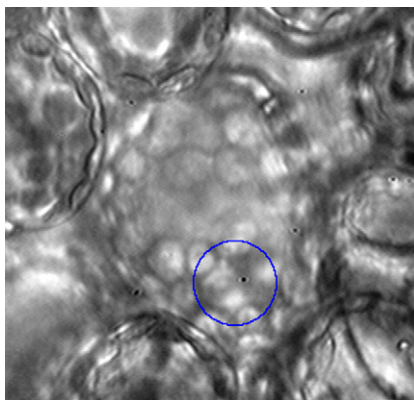

**Movie S5.** Chloroplast avoidance movement in *web1-1/pmi2-3*. A mesophyll cell was irradiated with strong blue light ( $30 \mu\text{mol m}^{-2} \text{s}^{-1}$ ). Images were acquired at 1-min intervals for 30 min. Circle indicates the irradiated area.

[Movie S5](#)
